# Supplementary material for: Carbon Dioxide Removal via Macroalgae Open-ocean Mariculture and Sinking: An Earth System Modeling Study
Source: Copernicus journal article supplement (doi:10.5194/esd-2021-104), 2022-01-14

MOS\_Conti/Stop  
yr2100

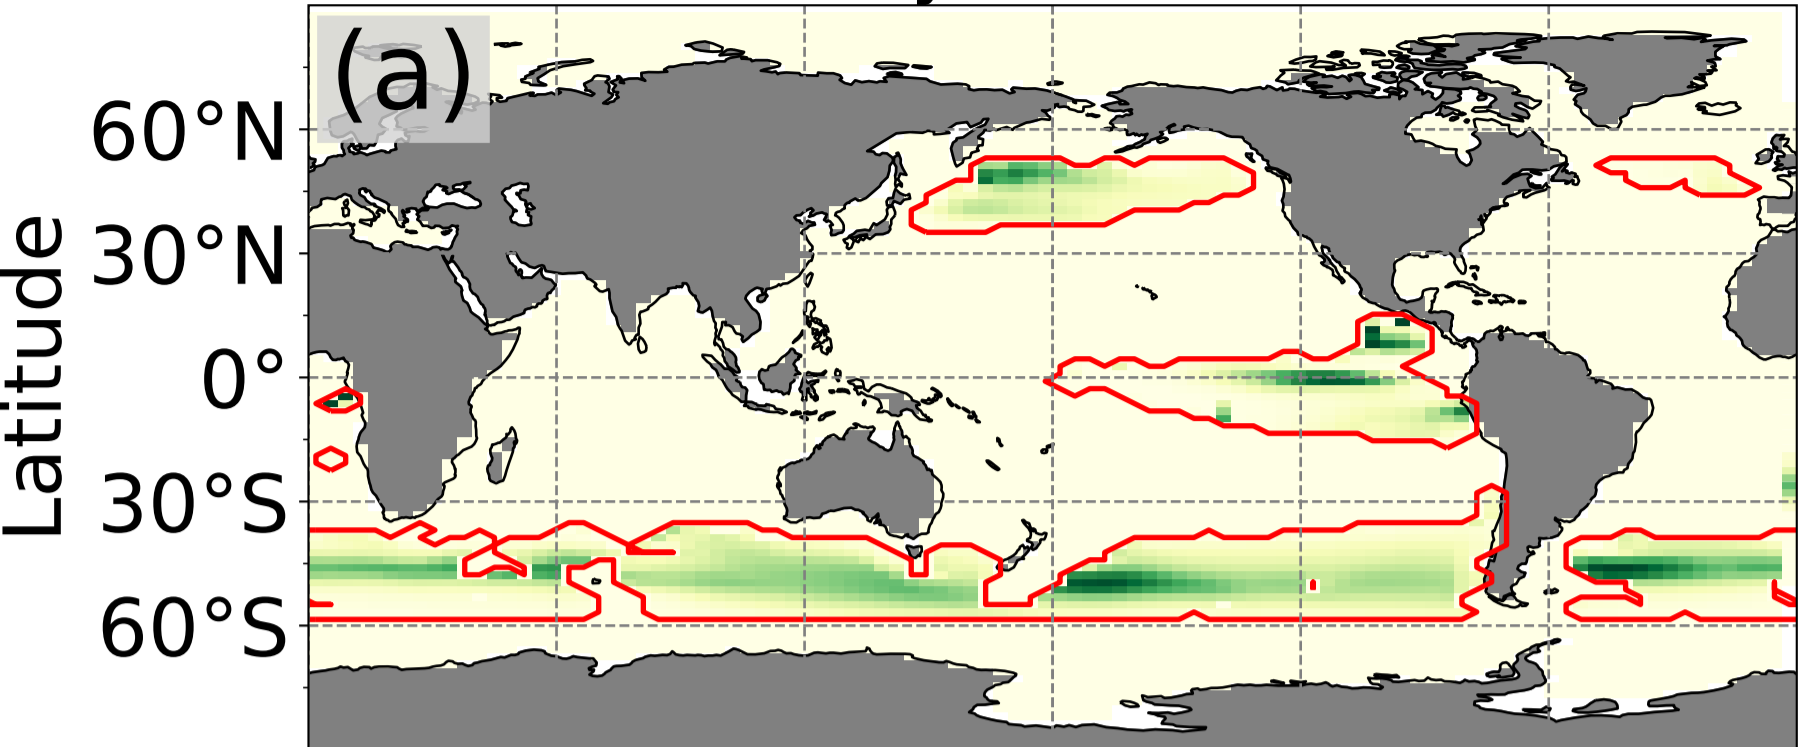

MOS\_Conti  
yr3000

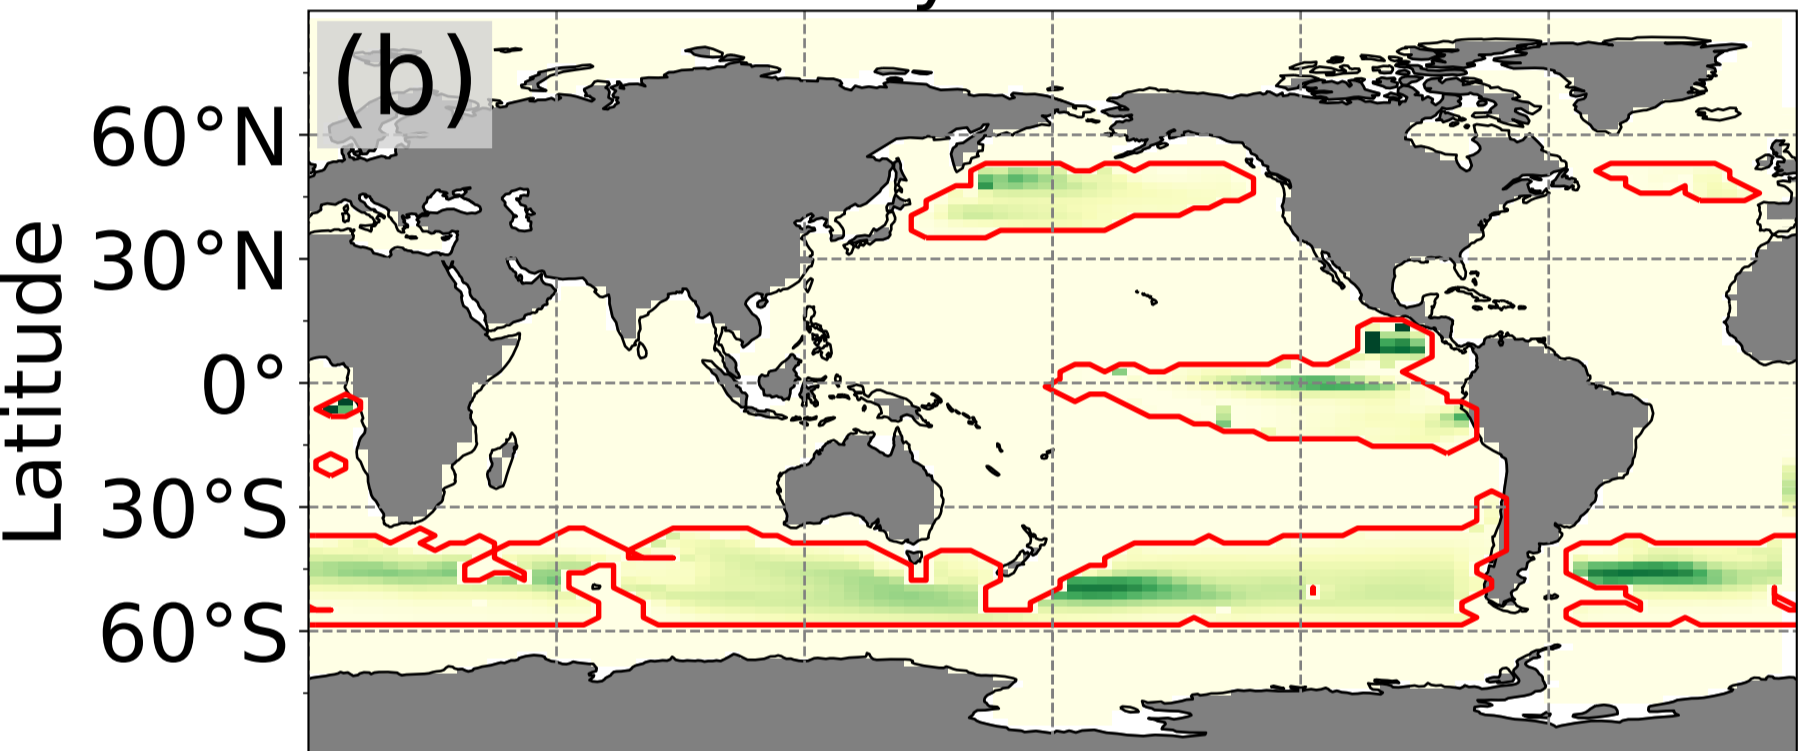

MOS\_AU\_Conti/Stop  
yr2100

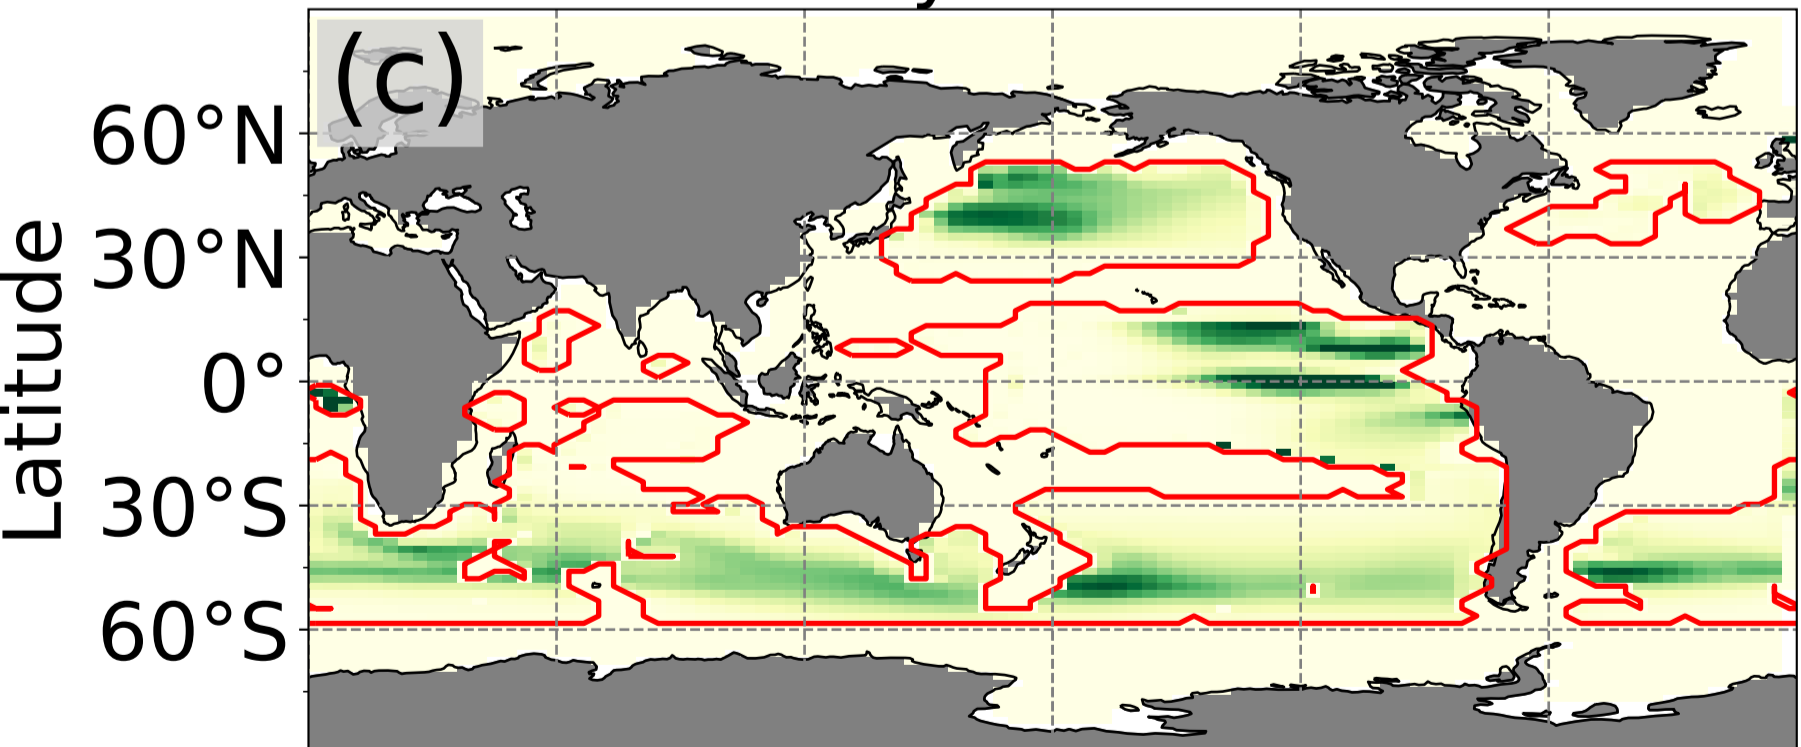

60°E 120°E 180° 120°W 60°W

Longitude

MOS biomass (kg wet weight  $\text{m}^{-2}$ )

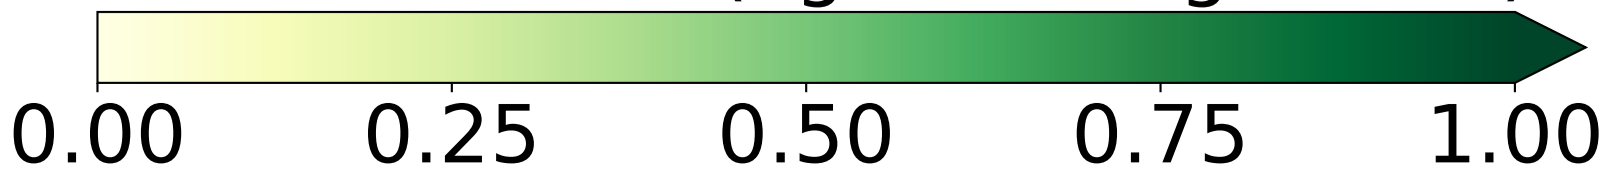

Supplement: Supplementary file [file esd-2021-104-AC7-supplement.pdf]
